# Supplementary material
Source: PubMed Central journal article supplement (PMC2762662)
Supplement: 0909150106_0909150106SI.pdf [file 0909150106_0909150106SI.pdf]

# Supporting Information

Pisliakov et al. 10.1073/pnas.0909150106

## SI Text

**1. Computational Methods and Computational Studies.** This section provides details about the specific studies performed in this work. It also provides a further description of the renormalization approach developed here.

**1.1. Simulating the Chemical Reaction of Adenylate Kinase (ADK).** The overall reaction mechanism of ADK can be described by the steps depicted in Fig. S1 (see also, e.g., ref. 1), and the chemical details of this reaction are shown in Fig. S2. We will consider two possible mechanisms here. The action of the protein starts upon the binding of the substrate to the protein in its open configuration, which is then followed by a conformational motion of the protein to its closed configuration and finally by a phosphoryl transfer reaction. The open and closed configurations are depicted in Fig. S3. To model the reaction in the protein, we first need to have a clear idea about the relevant reference reaction in solution, and this issue is addressed in this section.

In principle, this reaction is a simple nucleophilic displacement reaction, in which a negatively charged oxygen atom on AMP acts as a nucleophile, attacking the  $P_\gamma$  of ATP, to yield a transition state in which the  $P_\gamma$  has pentavalent coordination. This transition state then dissociates to yield two ADP. To analyze the energetics of this reaction, we started with a systematic study of the corresponding reference reaction in solution. We evaluated the two-dimensional (2-D) free energy surface by means of careful reaction coordinate mapping. Our reaction coordinates were defined as a function of the  $P_\gamma$ - $O_{\text{nuc}}$  and  $P_\gamma$ - $O_{\text{lg}}$  distances, which were each mapped from 1.6 Å to 2.8 Å in 0.15-Å increments. All ab initio calculations were performed by using the Gaussian03 software package (2). For simplicity, adenosine was substituted by a methyl group throughout. The geometry at each point on the free energy surface was obtained by means of gas-phase optimizations by using the 6-31+G\* basis set and the MPW1PW91 hybrid functional (3). Solvation was subsequently simulated as a single point correction to the SCF energy by using the COSMO (4, 5) continuum model. The resulting free energy surface was then used to identify the location of key stationary points, and all energies are given relative to the sum energies of the nucleophile and substrate at infinite separation. Note that more in-depth studies of the reaction mechanism by using hybrid quantum mechanical/molecular mechanical free energy perturbation approaches will be done in the future. Finally, the configurational entropy ( $-T\Delta S_{\text{conf}}$ ) was evaluated by means of the restraint release approach, as outlined in detail in refs. 6 and 7. The approach used here has been shown to successfully reproduce experimental free energies for phosphate hydrolysis (8–12).

When examining the reaction mechanism, it is important to consider the fact that the nucleophilic AMP may be protonated at  $P_\alpha$ , with this proton being transferred onto the  $\gamma$ -phosphate during the reaction, but there is no experimental data available addressing this issue. Thus, for comparison, we have considered AMP attack on ATP in solution both for the case when the AMP is not protonated and for the case when the AMP is protonated at  $P_\alpha$ . The resulting free energy surfaces (as well as the corresponding transition state geometries) are shown in Fig. S4A and B, respectively. An examination of the free energy surfaces for both phosphoryl transfer reactions shows that the pathway is not dependent on the protonation state—as, regardless of the protonation state of the nucleophile, the reaction proceeds through a concerted  $A_ND_N$  pathway (a detailed discussion of the differ-

ent mechanistic possibilities can be found in, e.g., refs. 9, 13, and 14) with a single transition state in which bond formation to the nucleophile and bond cleavage to the leaving group occur simultaneously—and that the reaction pathway is overall associative in nature. However, the precise transition state varies according to the protonation state of the nucleophile, as shown in Fig. S4. When the nucleophile is not protonated, the reaction proceeds via a more expansive transition state, with P–O distances of 1.9 Å and 2.5 Å to the nucleophile and leaving group respectively, and a barrier of 21.4 kcal/mol. In comparison, the transition state for the reaction where the nucleophile is protonated at  $P_\alpha$  is significantly more compact, with P–O distances of 1.9 Å and 1.75 Å to the nucleophile and leaving group, respectively. Additionally,  $\Delta G_{\text{calc}}^\ddagger$  is 4.6 kcal/mol higher when the nucleophile is protonated at  $P_\alpha$  (26.0 kcal/mol), as compared with the situation where the nucleophile is not protonated. Combining this finding with the fact that the system with the protonated AMP gives a higher barrier with the  $pK_a$  difference between the nucleophile and substrate [5.83 for ATP complexed to a magnesium cation (15), and 6.1 and 3.3 for AMP in the two different protonation states respectively (16)] strongly suggests that even though both mechanisms are possible, the most likely scenario is one in which the reaction in ADK proceeds via a deprotonated nucleophile, and this is therefore the mechanism considered in the remainder of this work.

Once we obtained a reasonable description of the solution reaction, we turned to the description of the enzymatic reaction. For this purpose, we used the empirical valence bond (EVB) method, which is a well-established and effective approach, especially in situations where extended sampling is needed (e.g., ref. 17). The EVB method has been described extensively elsewhere (18, 19), and we provide here only the most relevant points.

As a first step, we built a solution EVB surface and calibrated this surface by using the ab initio solution surface for the mechanism shown in Fig. S2A (in which the AMP is not protonated). The corresponding EVB free energy profile for the solution reaction, as well as the resonance structures used, are shown in Fig. S5. The calibrated EVB parameters were then used (unchanged) to generate the EVB surface of the reaction in the closed configuration of the protein (i.e., at this step, we replaced the environment of the reaction in solution by the actual protein). Here, the initial structure of the enzyme in the closed configuration (20) was taken from the Protein Data Bank (21) (PDB code: 2rgx), and the ligands were introduced via a docking procedure, followed by a long relaxation run. The EVB calculations involved a free energy perturbation umbrella sampling (FEP-US) procedure (18, 19), which was performed while using 11 windows of 100 ps each, with a 1-fs time step. The resulting EVB surface for the ADK reaction is shown in Fig. S5 along with the profile obtained in solution. The calculated barriers for the reaction in the enzyme and in solution are 20 kcal/mol and 40 kcal/mol, respectively, whereas the corresponding observed barrier in the enzyme is  $\approx 14$  kcal/mol. In the case of the solution reaction, there is no experimental estimate of this barrier in the literature, and we can therefore only assess it from calculations. It should also be noted that although we could have invested even more effort into the evaluation of the surfaces of both the solution and the protein reactions, such an investment is not directly relevant to the issue here, as our aim is not to deeply characterize ADK but rather to explore the link between conformational dynamics and chemistry.



where  $\alpha = 1, 2$  corresponds to the effective conformational and chemical coordinates, respectively,  $Q_\alpha = (M_\alpha \omega_\alpha / \hbar)^{1/2} Q'_\alpha$ ,  $\delta_\alpha = (M_\alpha \omega_\alpha / \hbar)^{1/2} \delta'_\alpha$ ,  $M_\alpha = k_B T / (\dot{Q}'_\alpha)^2$  and  $\Gamma_\alpha$  are the effective mass and friction of these two coordinates,  $k_B$  is Boltzmann's constant,  $T$  is the temperature, and  $U_{\text{con}}$  is a constraint potential in the model C. The key issue here is to force the dynamics of the simplified 2-D model to correspond to that of the full atomistic model. Because the CG model has already been fitted to the full model, we can fit the 2-D model to the CG model (i.e., model C to model B). As in the “fitting” of the dynamics of models A and B, we again evaluate the transition time for moving between the two generated sets of coordinates in each model (e.g., the time required to move between two significantly different coordinate sets  $\mathbf{q}_1'$  and  $\mathbf{q}_2'$  in model B should correspond to the time of moving between the equivalent coordinates in model C) for different values of the applied constraint. We then refine the friction,  $\Gamma_\alpha$ , by comparing the transition time obtained from the dynamics in different models.

The next important element (the “fine-tuning” of the dynamical properties at different timescales) of our renormalization approach is the requirement that the autocorrelation of the energy gap and other related properties will have similar behavior in all three models used in this study. The details of this part are given in the next section for the specific example of ADK.

#### 1.4. Forcing the Dynamics of ADK to Be Similar in the Different Models.

As stated above, our renormalization procedure is aimed at capturing the dynamics of the full model in both the CG and 2-D models. This strategy was applied in the present work to the modeling of ADK, starting by applying a strong constraint to all three models, driving each system from the open to the closed structure, and then adjusting the friction constants  $\gamma_\eta$  (in model B) and  $\Gamma_\alpha$  (in model C) to get similar time dependence to that obtained in the full model. The corresponding process is described in Fig. S6. In principle, we could obtain a more accurate representation of the full model by the reduced models if we use the above approach on a longer timescale (while using a weaker constraint), but this is out of the scope of the present work.

We further refined the dynamical properties for the short timescale range of the simplified models by calculating the short timescale autocorrelation functions (ACF) of the conformational coordinates for several different friction constants and subsequently selected the friction constants that gave the best agreement with the ACF of the full model (see Fig. S7). The use of different values of  $\gamma_\eta$  in Fig. S7 demonstrates part of our fitting procedure. Finally, we also forced the short-time dynamics of the chemical coordinate of the three models to be similar by requiring that the autocorrelations of the energy gap are similar. The resulting short timescale dynamics of the chemical coordinate of the three models is given in Fig. S8. Overall, even though the fitting is not perfect (e.g., better agreement could be obtained by having two different friction constants in the CG model: one for the chemical and one for the conformational changes), it is adequate for the purposes of this work. Moreover, in principle we might invoke time-dependent friction kernels (26, 27). However, such treatments are not justified at the present stage because the friction constants used already provide a reasonable starting point for the analysis reported in the text. Furthermore, we have examined dynamical effects for drastically different effective frictions by changing the “corrugation” of the

system (and the relevant corresponding correlation time), by the use of Eq. S3 (see also Fig. 3 of the main text).

Armed with a reasonably calibrated model, we can then explore the long timescale motions by using the 2-D model (without any constraints). The results of such simulations are shown in Fig. 2 of the main text. The simulated results can be qualitatively converted to motions in the CG model, as shown in the Movie S1. However, here we focus mainly on using the 2-D model to explore the dynamical proposal, as is discussed in the main text and *Exploring Dynamical Effects*.

**2. Exploring Dynamical Effects.** Defining the issues in the field can benefit from considering the diagram in Fig. S9. As seen from the figure, we can represent the key hypothesis in one of two ways. The first of these is a diffusive model (Fig. S9 A and B). In this model, the energy of the conformational motion is completely dissipated before the chemical process. The alternative is an inertial model (Fig. S9 C and D), where the conformational motion is somehow “remembered” during the chemical motion, and thus this represents a true and well-defined dynamical effect, which can presumably enhance the chemical rate. The work summarized in the main text (and particularly in Figs. 3 and 4) demonstrates that the motions on the conformational–chemical landscape are extremely unlikely to correspond to the inertial model, at least as long as the chemical barrier is higher than a few  $k_B T$ . In general, as shown in Fig. 3, the inertial model is also unlikely to be valid as long as the barriers between the different configurations in the ground state are lower than the chemical barrier. In this case the solution of the multistate rate equation for the system will follow the trend dictated by the highest activation barriers. It is also useful to note that, in practice, the chemical barriers in most enzymes are greater than the diffusion limit ( $\approx 9$  kcal/mol) and are thus likely to be the determining factor for the overall rate, an issue that has been discussed at length in recent studies of both chorismate mutase (28) and DNA polymerase (29). It is true, of course, that neither of these works addressed the hypothetical scenario in which the barrier for the binding step is much higher than the chemical barrier, but this is anyhow a highly unlikely scenario. That is, there is no evolutionary pressure to reduce the chemical barrier for an enzyme-catalyzed reaction far below the diffusion controlled limit, making it improbable that the chemical barrier will be much lower than the binding (or product release) barrier. However, such a hypothetical case was in fact modeled recently (30).

The present work has also examined the related intriguing proposal that the binding energy of the substrate can be used to induce the conformational change, with the resulting kinetic energy driving the chemical reaction and this study is described in Figs. 4 and 5 of the main text. Overall, we established that the kinetic energy of the conformational motion is dissipated before the chemical step, for cases with a significant chemical barrier. However, for the case with a very low chemical barrier, we found that trajectories that start from a slightly open structure and move with excess kinetic energy to the closed form take a longer amount of time to cross the chemical barrier than trajectories that start from the closed form. For example, when using strong constraints of  $5 \text{ kcal mol}^{-1} \text{ \AA}^{-2}$ , we found that the first passage times are  $\approx 100$  ps and  $\approx 280$  ps for trajectories that start at the closed and partially open structures respectively. This effect reflects excursions in the conformational space, which can slow down the arrival of the trajectory to the optimal point for crossing the chemical barrier.

1. Wolf-Watz M, et al. (2004) Linkage between dynamics and catalysis in a thermophilic-mesophilic enzyme pair. *Nat Struct Mol Biol* 11:945–949.
2. Frisch MJ, et al. (2004) GAUSSIAN 03 (Revision C. 02).
3. Adamo C, Barone V (1998) Exchange functionals with improved long-range behavior and adiabatic connection methods without adjustable parameters: The mPW and mPW1PW models. *J Chem Phys* 108:664–675.

4. Barone V, Cossi M (1998) Quantum calculation of molecular energies and energy gradients in solution by a conductor solvent model. *J Phys Chem A* 102:1995–2001.
5. Klamt A, Schüürmann GJ (1993) COSMO: A new approach to dielectric screening in solvents with explicit expressions for the screening energy and its gradient. *J Chem Soc Perkin Trans 2* 5:799–805.

6. Strajbl M, Sham YY, Villa J, Chu ZT, Warshel A (2000) Calculation of activation entropies of chemical reactions in solution. *J Phys Chem B* 104:4578–4584.
7. Sharma PK, Xiang Y, Kato M, Warshel A (2005) What are the roles of substrate assisted catalysis and proximity effects in peptide bond formation by the ribosome? *Biochemistry* 44:11307–11314.
8. Klahn M, Rosta E, Warshel A (2006) On the mechanism of hydrolysis of phosphate monoester dianions in solution and proteins. *J Am Chem Soc* 128:15310–15323.
9. Rosta E, Kamerlin SCL, Warshel A (2008) On the interpretation of the observed LFER in phosphate hydrolysis: A thorough computational study of phosphate diester hydrolysis in solution. *Biochemistry* 47:3725–3735.
10. Kamerlin SCL, Florian J, Warshel A (2008) Associative versus dissociative mechanisms of phosphate monoester hydrolysis: On the interpretation of activation entropies. *Chem Phys Chem* 9:1767–1773.
11. Kamerlin SCL, Williams NH, Warshel A (2008) Dineopentyl phosphate hydrolysis: Evidence for stepwise water attack. *J Org Chem* 73:6960–6969.
12. Kamerlin SCL, Haranczyk M, Warshel A (2009) Are mixed explicit/implicit solvation models reliable for studying phosphate hydrolysis? A comparative study of continuum, explicit and mixed solvation models. *Chem Phys Chem* 10:1125–1134.
13. Wilkie J, Gani D (1996) Comparison of inline and non-inline associative and dissociative reaction pathways for model reactions of phosphate monoester hydrolysis. *J Chem Soc Perkin Trans 2* 2:783–787.
14. Kamerlin SCL, Wilkie J (2007) The role of metal ions in phosphate ester hydrolysis. *Org Biomol Chem* 5:2098–2108.
15. Shikama K (1971) Standard free energy maps for the hydrolysis of ATP as a function of pH, pMg and pCa. *Arch Biochem Biophys* 147:311–317.
16. Westheimer FH, Jencks WP (2003) *Aqueous  $pK_a$  Values*. (Am Chem Soc, Washington DC).
17. Roca M, Vardi-Kilshtain A, Warshel A (2009) Toward accurate screening in computer-aided enzyme design. *Biochemistry* 48:3046–3056.
18. Warshel A (1991) *Computer Modeling of Chemical Reactions in Enzymes and Solutions* (John Wiley & Sons, New York).
19. Åqvist J, Warshel A (1993) Simulations of enzyme reactions using valence bond force fields and other hybrid quantum/classical approaches. *Chem Rev* 93:2523–2544.
20. Henzler-Wildman KA, et al. (2007) Intrinsic motions along an enzymatic reaction trajectory. (PDB ID: 2rgx). *Nature* 450:838–844.
21. Berman HM, et al. (2000) The protein data bank. *Nucl Acids Res* 28:235–242.
22. Roca M, Messer B, Hilvert D, Warshel A (2008) On the relationship between folding and chemical landscapes in enzyme catalysis. *Proc Natl Acad Sci USA* 105:13877–13882.
23. Levitt M, Warshel A (1975) Computer simulation of protein folding. *Nature* 253:694–698.
24. Braun-Sand S, Strajbl M, Warshel A (2004) Studies of proton translocations in biological systems: Simulating proton transport in carbonic anhydrase by EVB based models. *Biophys J* 87:2221–2239.
25. McQuarrie DA (1976) *Statistical Mechanics* (Harper and Row, New York).
26. Adelman SA (1976) Fokker-plank equations for simple non-Markovian systems. *J Chem Phys* 64:124–130.
27. Grote RF, Hynes JT (1980) The stable states picture of chemical reactions. II. Rate constants for condensed and gas phase reaction models. *J Chem Phys* 73:2715–2732.
28. Roca M, Messer B, Hilvert D, Warshel A (2008) On the relationship between folding and chemical landscapes in enzyme catalysis. *Proc Natl Acad Sci USA* 105:13877–13882.
29. Xiang Y, Goodman MF, Beard WA, Wilson SH, Warshel A (2008) Exploring the role of large conformational changes in the fidelity of DNA polymerase  $\beta$ . *Proteins* 70:231–247.
30. Min W, Xie XS, Baghchi B (2008) Two-dimensional reaction free energy surfaces of catalytic reaction: Effects of protein conformational dynamics on enzyme catalysis. *J Phys Chem B* 112:454–466.

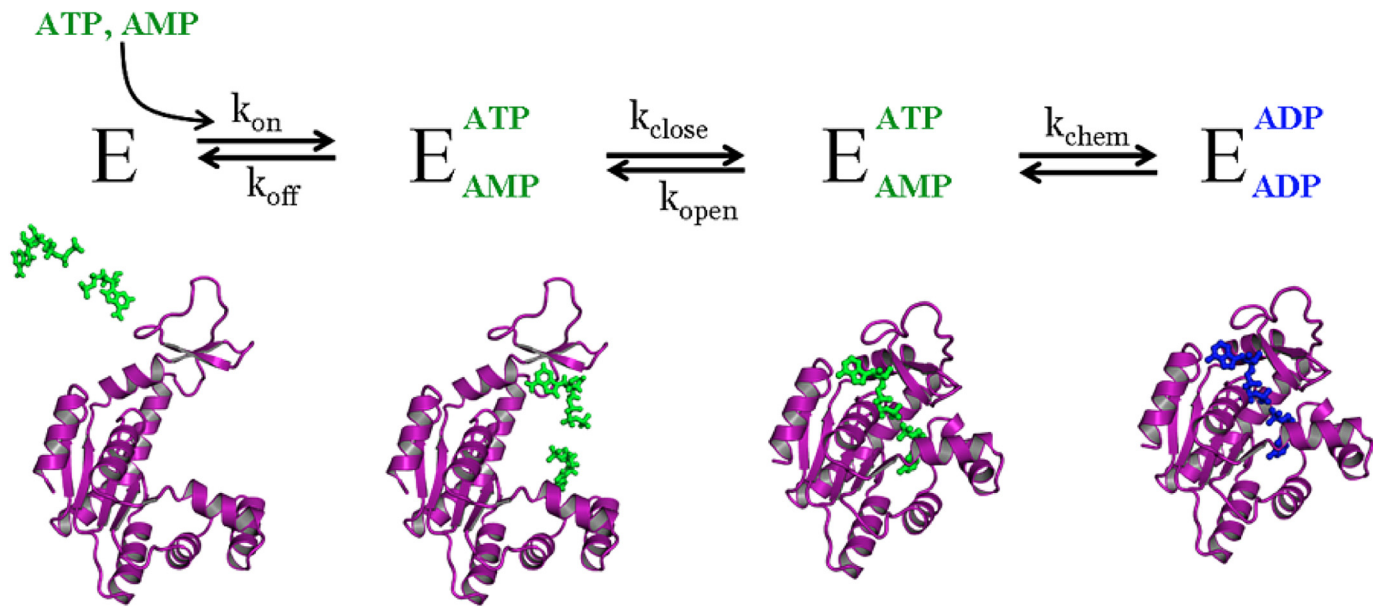

**Fig. S1.** The ADK reaction scheme, with rates corresponding to the different steps in the reaction. Namely, substrate binding and dissociation ( $k_{\text{on}}/k_{\text{off}}$ ), the conformational change ( $k_{\text{close}}/k_{\text{open}}$ ), and the chemical step ( $k_{\text{chem}}$ ).



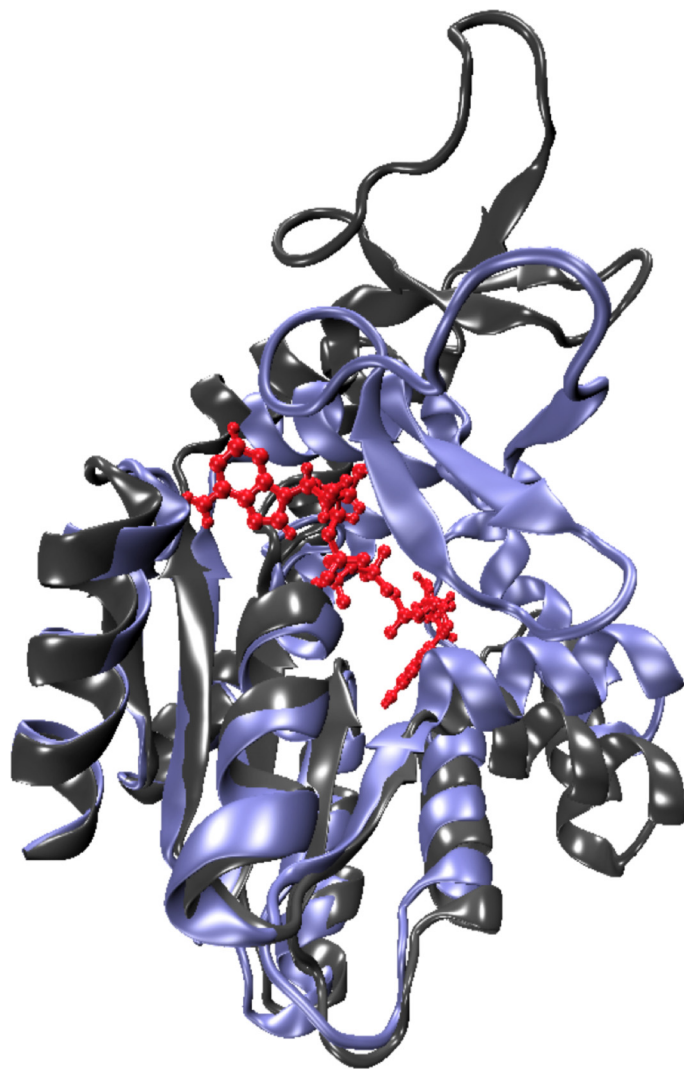

**Fig. S3.** The structures of the open (dark gray) and closed (ice blue) forms of ADK.

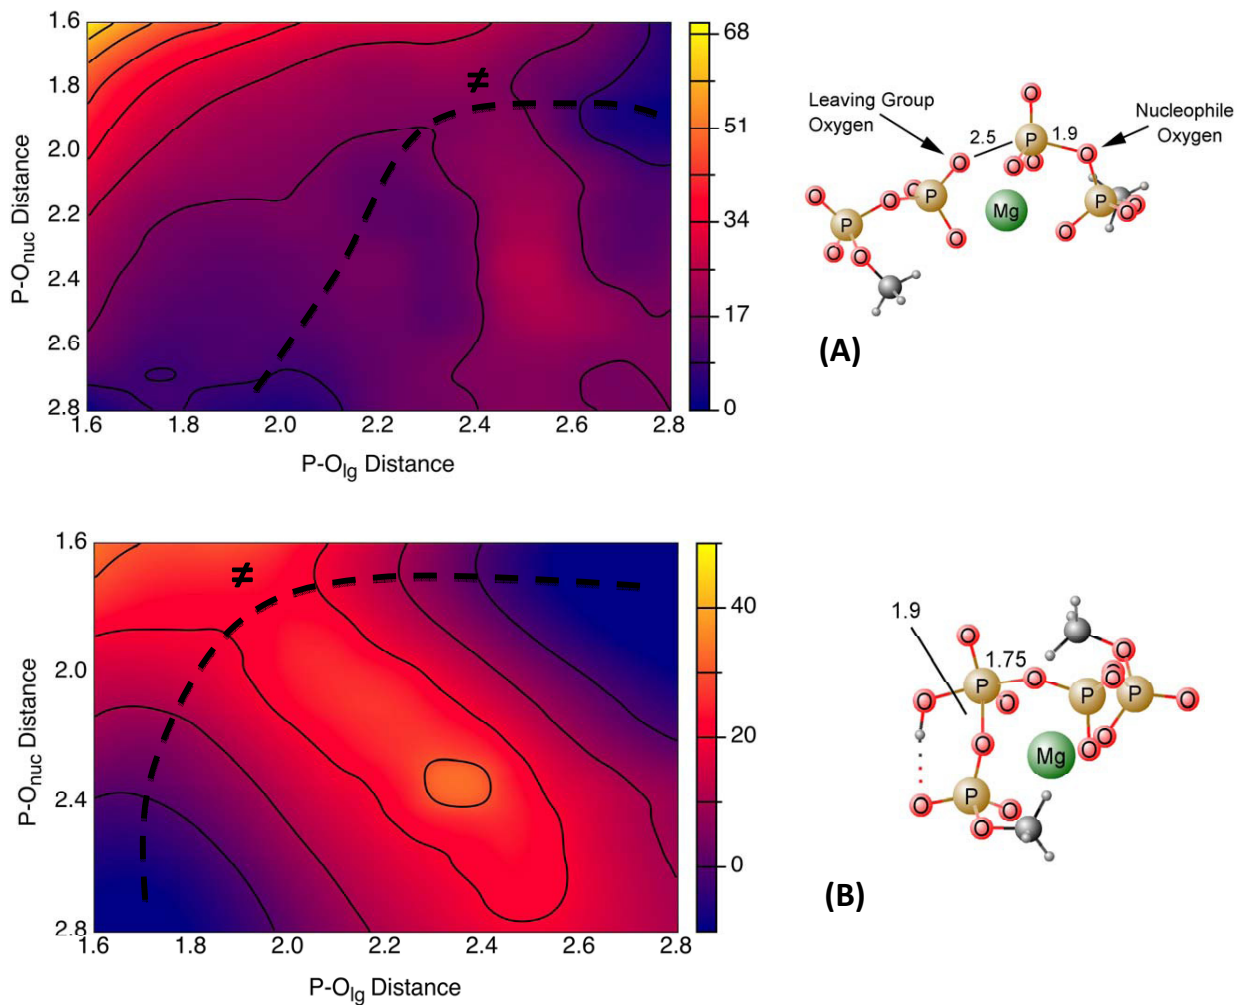

**Fig. 54.** The calculated free energy surfaces and corresponding transition states for the reference solution reaction when the AMP is unprotonated (A) and protonated at  $P_{\alpha}$  (B).



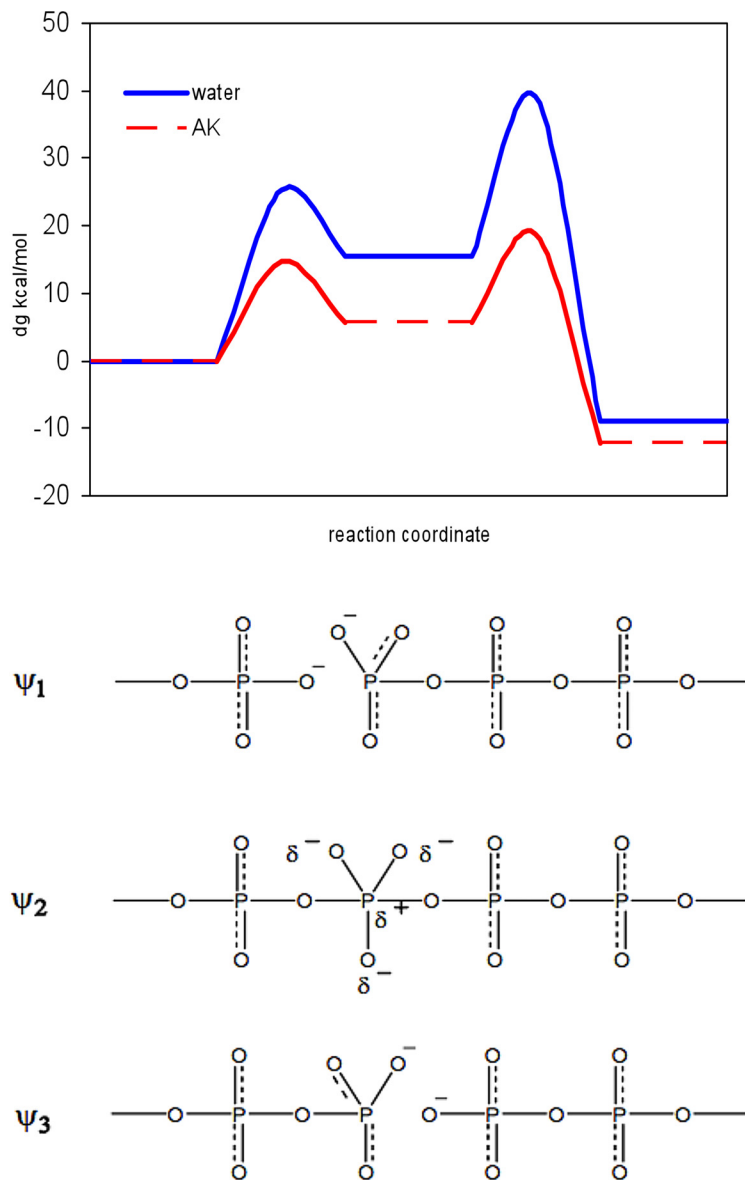

**Fig. S5.** The EVB free energy surface for the reaction in the protein and in the solution as well as the resonance structures used for modeling this reaction. The EVB calculations involved the FEP-US procedure, which was performed in 11 windows of 100 ps each, using a 1-fs time step.

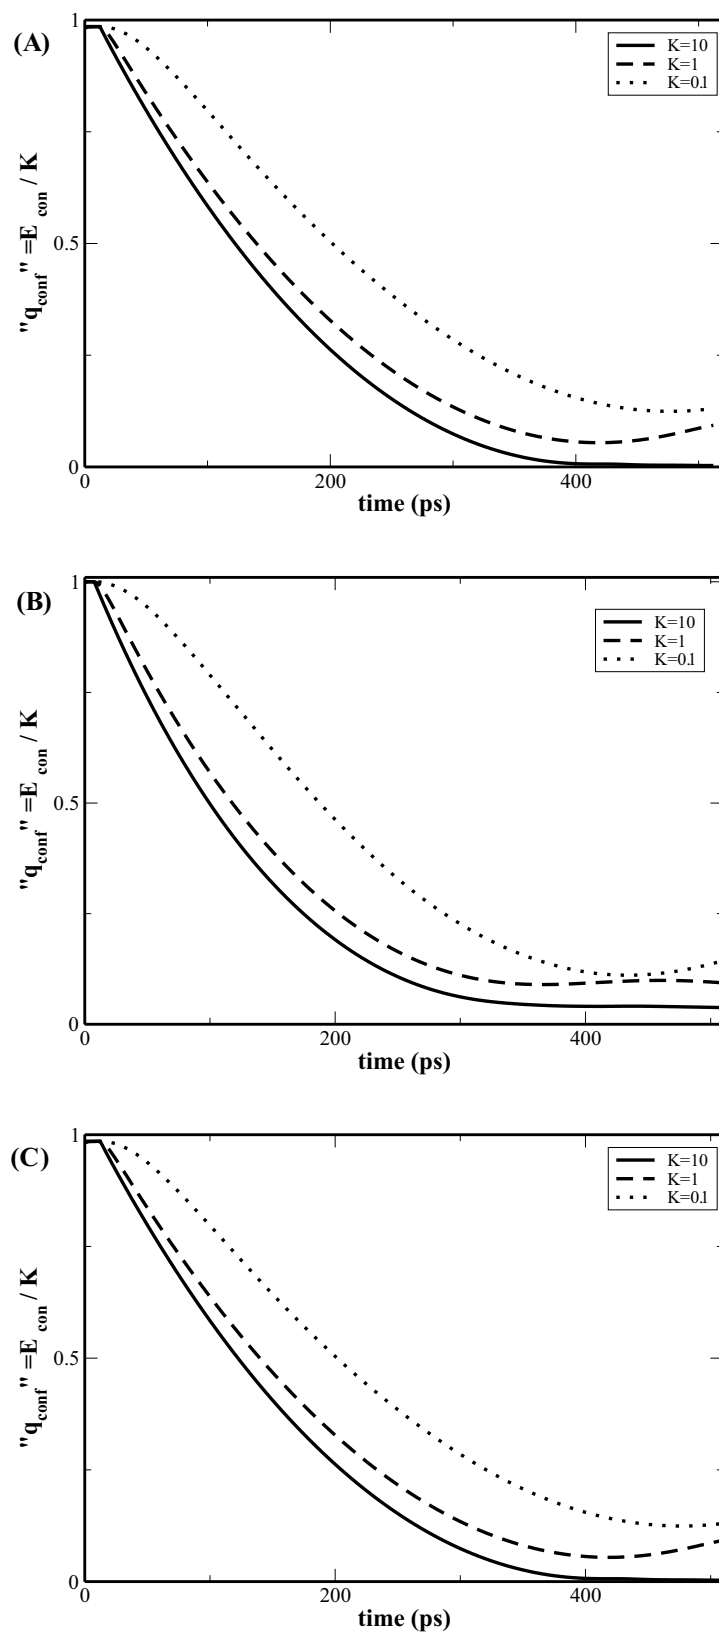

**Fig. S6.** The time dependence of the effective conformational coordinate for trajectories that move from the open to closed configurations with different constraints in the explicit model (A), the CG model with optimized friction (B), and the 2-D model (C).

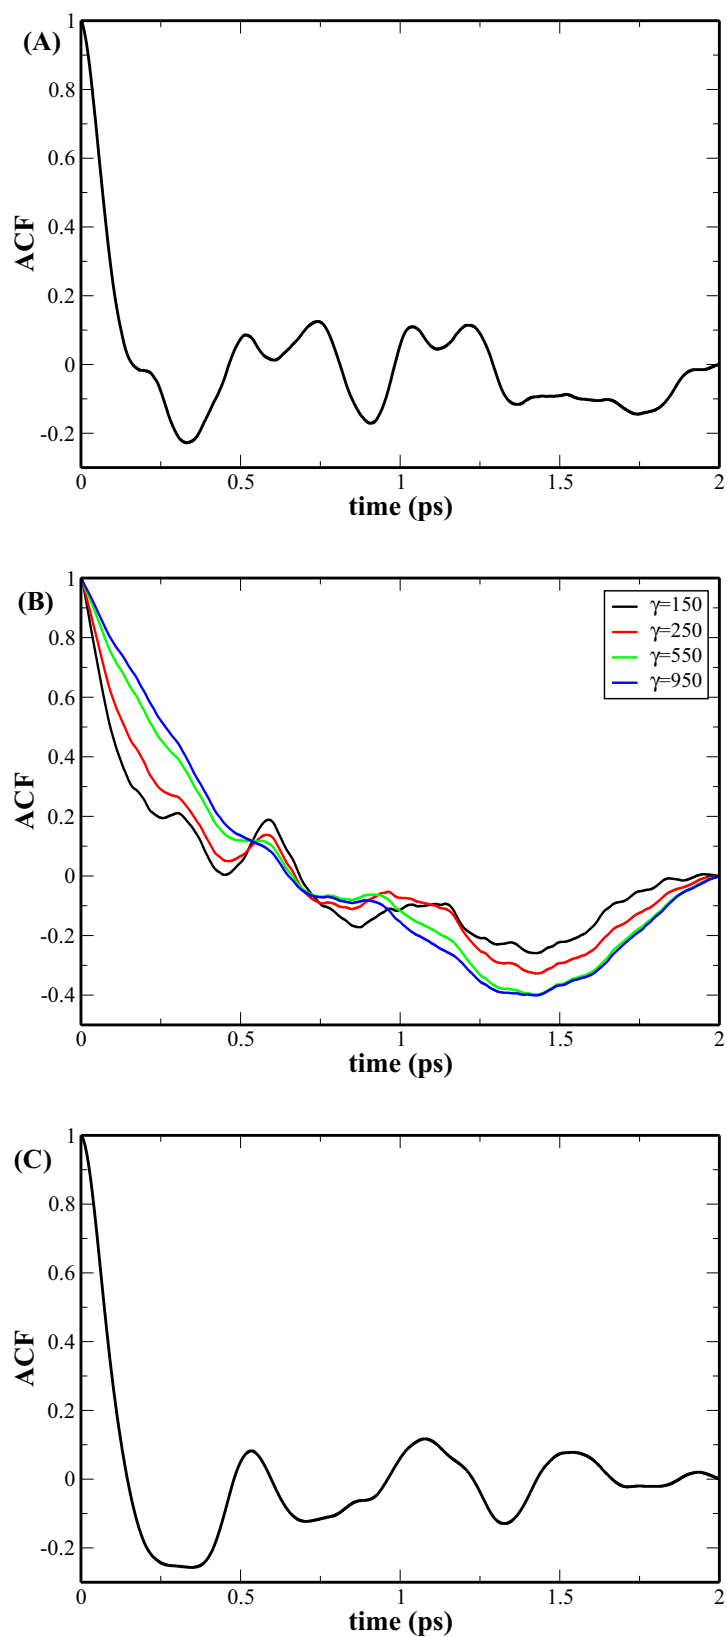

**Fig. S7.** The short-time ACFs of the conformational coordinate of the full (A), CG (B) and the 2-D (C) models. Four different values of  $\gamma_q$  (i.e., 150, 250, 550, and 950 ps<sup>-1</sup>, respectively) were used in the CG model, whereas for the 2-D model we used a  $\gamma_{\text{conf}}$  of 10 ps<sup>-1</sup>. The use of different values in the CG model illustrates our fitting procedure, as discussed in *Renormalizing the Landscape and Dynamics of Enzymatic Reactions*.

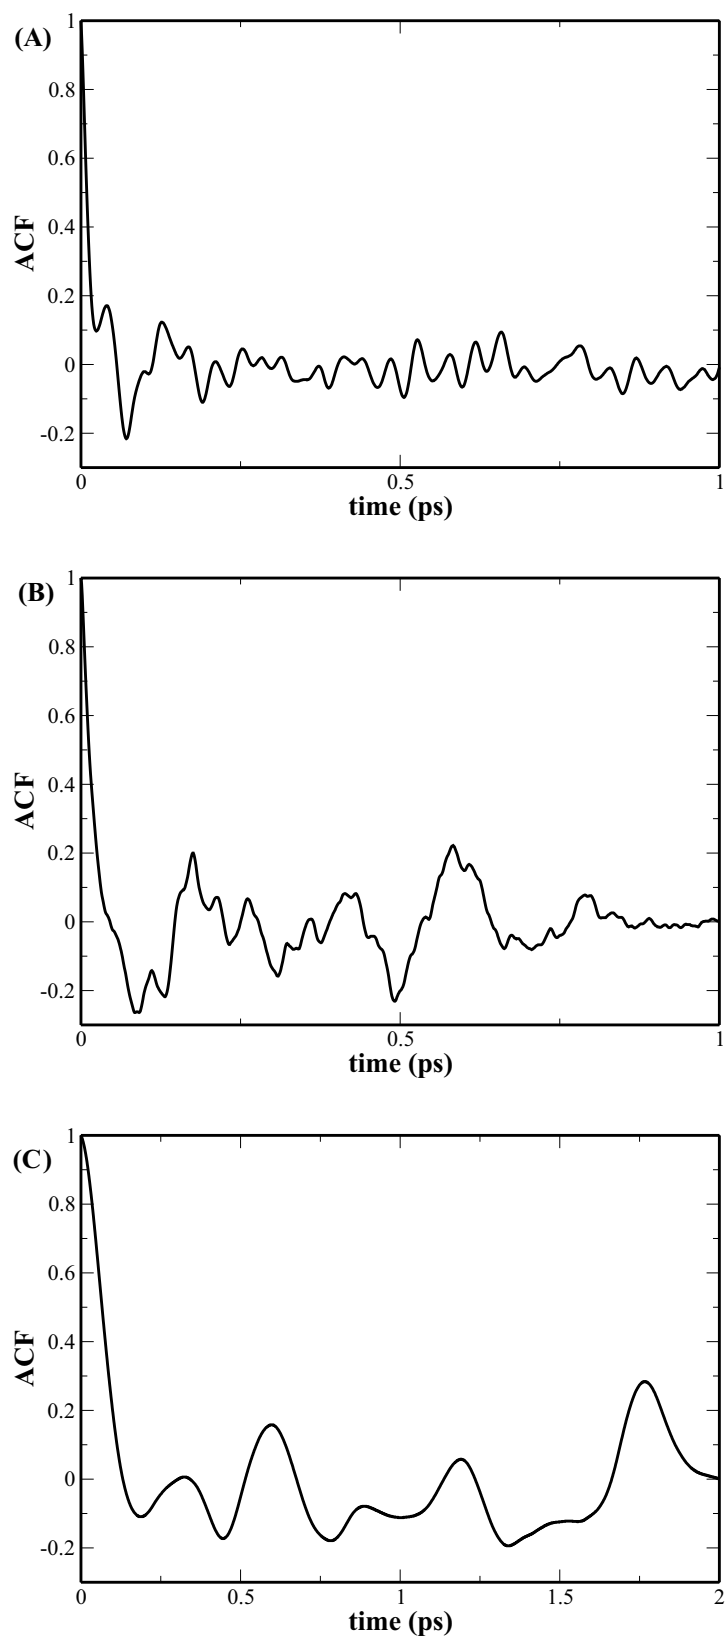

**Fig. S8.** The short-time dynamics of the chemical coordinate of the explicit (A), CG (B) and the 2-D (C) models. The optimized value of  $\gamma_q$  for the CG model was  $250 \text{ ps}^{-1}$ , whereas the optimal value of  $\gamma_{\text{chem}}$  for the 2-D model was found to be  $10 \text{ ps}^{-1}$ .

### Diffusive Model (No Memory)

$$\Delta g_{\text{conf}}^{\ddagger} \ll \Delta g_{\text{chem}}^{\ddagger}$$

### Inertial Model (Memory)

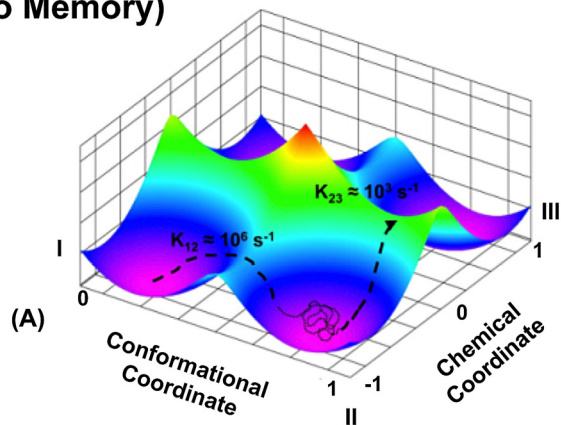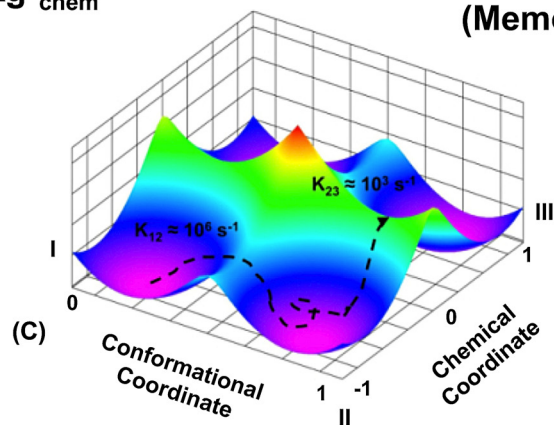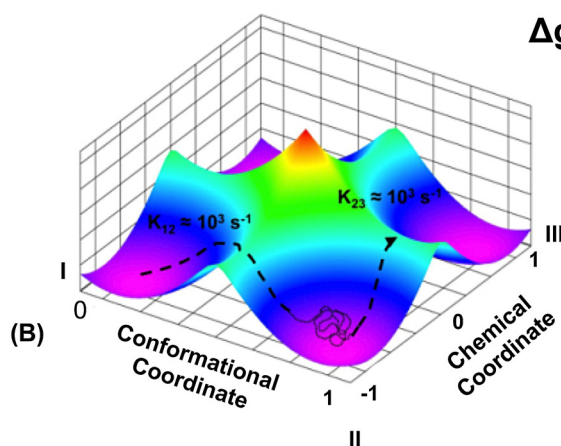

$$\Delta g_{\text{conf}}^{\ddagger} \approx \Delta g_{\text{chem}}^{\ddagger}$$

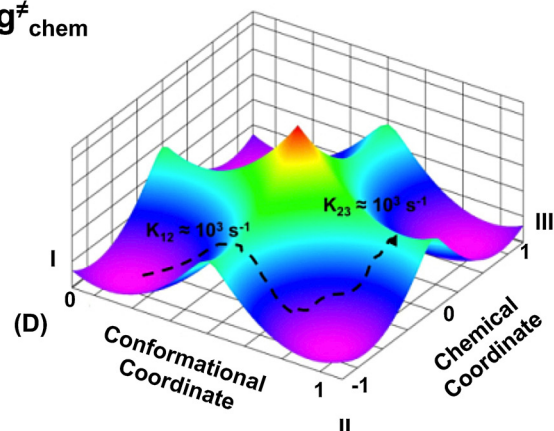

Fig. S9. A schematic depiction of the diffusive (A and B) and the inertial (C and D) models. These two limiting models are shown in the case where the conformational barrier is much smaller than the chemical one (i.e.,  $\Delta g_{\text{conf}}^{\ddagger} \ll \Delta g_{\text{chem}}^{\ddagger}$ ; A and C), and where the two barriers are similar (i.e.,  $\Delta g_{\text{conf}}^{\ddagger} \approx \Delta g_{\text{chem}}^{\ddagger}$ ; B and D).

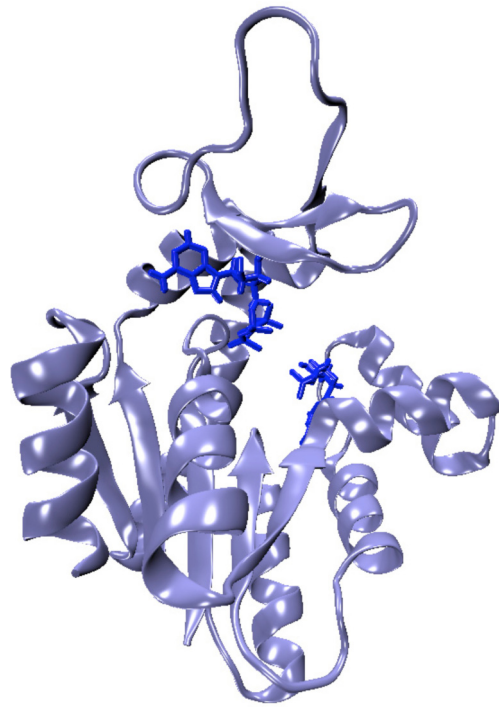

**Movie S1.** This movie depicts the motion obtained when forcing the long timescale conformational dynamics of the 2-D model to reproduce the experimentally observed values of  $k_{\text{open}}$  and  $k_{\text{close}}$  (where  $k_{\text{close}}$  is obtained from  $k_{\text{open}}$  by using a detailed balance), and subsequently mapping the resulting motion onto the CG model.

[Movie S1 \(MOV\)](#)
